# Supplementary material for: Investigating Pollen and Gene Flow of WYMV-Resistant Transgenic Wheat N12-1 Using a Dwarf Male-Sterile Line as the Pollen Receptor
Source: PLOS journal article supplement (doi:10.1371/journal.pone.0151373), 2016-03-14
Supplement: S1 (10.1371/journal.pone.0151373.s001) [file journal.pone.0151373.s001]

**S1 Table.** Pollen density detected in eight compass sectors at different distance from pollen source.

| Distances(m) | Pollen density in eight compass sectors | | | | | | | |
| --- | --- | --- | --- | --- | --- | --- | --- | --- |
|  | E | SE | S | SW | W | NW | N | NE |
| 0 | 206.07 | 343.45 | 305.98 | 518.30 | 418.38 | 474.58 | 168.60 | 106.16 |
| 0 | 206.07 | 430.87 | 293.49 | 443.36 | 380.92 | 318.47 | 212.31 | 87.42 |
| 0 | 218.56 | 412.14 | 305.98 | 537.03 | 430.87 | 262.27 | 181.09 | 124.89 |
| 0 | 174.85 | 399.65 | 287.25 | 462.10 | 380.92 | 305.98 | 206.07 | 131.14 |
| 0 | 199.83 | 412.14 | 293.49 | 474.58 | 424.63 | 368.43 | 249.78 | 143.62 |
| 1 | 49.96 | 106.16 | 118.65 | 162.36 | 137.38 | 124.89 | 93.67 | 43.71 |
| 1 | 49.96 | 93.67 | 131.14 | 206.07 | 174.85 | 112.40 | 87.42 | 31.22 |
| 1 | 62.45 | 106.16 | 99.91 | 212.31 | 156.11 | 131.14 | 74.93 | 43.71 |
| 1 | 56.20 | 131.14 | 99.91 | 218.56 | 156.11 | 99.91 | 37.47 | 37.47 |
| 1 | 37.47 | 74.93 | 106.16 | 193.58 | 162.36 | 106.16 | 74.93 | 62.45 |
| 2 | 37.47 | 31.22 | 56.20 | 106.16 | 87.42 | 0 | 24.98 | 37.47 |
| 2 | 31.22 | 24.98 | 62.45 | 106.16 | 118.65 | 0 | 62.45 | 24.98 |
| 2 | 18.73 | 24.98 | 62.45 | 137.38 | 99.91 | 62.45 | 12.49 | 24.98 |
| 2 | 31.22 | 37.47 | 56.20 | 143.62 | 87.42 | 81.18 | 37.47 | 37.47 |
| 2 | 12.49 | 18.73 | 87.42 | 137.38 | 87.42 | 81.18 | 43.71 | 37.47 |
| 5 | 6.24 | 0 | 12.49 | 37.47 | 31.22 | 24.98 | 0 | 6.24 |
| 5 | 12.49 | 0 | 0 | 43.71 | 37.47 | 49.96 | 6.24 | 12.49 |
| 5 | 6.24 | 0 | 56.20 | 37.47 | 18.73 | 12.49 | 0 | 6.24 |
| 5 | 0 | 0 | 31.22 | 49.96 | 12.49 | 18.73 | 6.24 | 18.73 |
| 5 | 12.49 | 24.98 | 24.98 | 31.22 | 18.73 | 6.24 | 12.49 | 24.98 |
| 10 | 6.24 | 0 | 43.71 | 24.98 | 6.24 | 6.24 | 0 | 6.24 |
| 10 | 6.24 | 0 | 12.49 | 37.47 | 0 | 0 | 0 | 6.24 |
| 10 | 0 | 12.49 | 12.49 | 24.98 | 0 | 6.24 | 0 | 12.49 |
| 10 | 6.24 | 0 | 24.98 | 31.22 | 0 | 0 | 0 | 0 |
| 10 | 6.24 | 6.24 | 31.22 | 18.73 | 0 | 12.49 | 18.73 | 12.49 |
| 20 | 0 | 0 | 12.49 | 24.98 | 6.24 | 0 | 6.24 | 6.24 |
| 20 | 0 | 0 | 0 | 24.98 | 0 | 12.49 | 0 | 0 |
| 20 | 0 | 0 | 0 | 12.49 | 0 | 0 | 0 | 0 |
| 20 | 6.24 | 6.24 | 0 | 18.73 | 0 | 0 | 6.24 | 6.24 |
| 20 | 0 | 0 | 0 | 24.98 | 0 | 0 | 0 | 0 |
| 30 | 0 | 0 | 0 | 0 | 0 | 0 | 18.73 | 0 |
| 30 | 0 | 0 | 0 | 0 | 0 | 0 | 0 | 6.24 |
| 30 | 0 | 0 | 0 | 6.24 | 0 | 0 | 0 | 0 |
| 30 | 0 | 6.24 | 6.24 | 0 | 0 | 0 | 0 | 0 |
| 30 | 0 | 0 | 0 | 0 | 0 | 0 | 0 | 0 |
| 50 | 0 | 0 | 0 | 0 | 0 | 0 | 0 | 0 |
| 50 | 0 | 0 | 0 | 0 | 0 | 0 | 0 | 0 |
| 50 | 0 | 0 | 0 | 0 | 0 | 0 | 0 | 0 |
| 50 | 0 | 6.24 | 0 | 0 | 0 | 0 | 0 | 0 |
| 50 | 0 | 0 | 6.24 | 0 | 0 | 0 | 0 | 0 |
